# Supplementary material
Source: Research Square preprint supplement (doi:10.21203/rs.3.rs-9596467/v1)
Supplement: Supplementary file 1 [file e97421c5bbb6d41460bd6b7b.docx]

**Supplementary Materials**

**Systematic Review Search Documentation**

*Artificial Intelligence - Large Language Models (LLMs) and Agentic AI in Clinical Decision Support in Outpatient, General Practice and Acute Settings: A Systematic Review*

K'Orimba K, Mwema E, Odawo E (2026)

**Contents:**

Supplementary Table S1: Full search strategy with adaptations for all 11 databases

Supplementary Table S2: Characteristics of all 50 included studies (full data extraction)

Supplementary Table S3: MMAT quality assessment results for all 50 included studies

Supplementary Table S4: PRISMA 2020 Checklist

Supplementary Table S5: Synthesis of Diagnostic Accuracy Findings Across Studies

Supplementary Table S6: Synthesis of Implementation Barriers and Facilitators

**Supplementary Table S1**

*Searches conducted: February 2026 | Databases searched: 11 | Date range: January 2021 - December 2026*

1. Search Summary Across All Databases

All 11 databases were searched in February 2026. The date range January 2021 to December 2026 was applied to all searches, save for databases with limitations, where search date of Feb 2026 was used as the end date.

**Table S1a: Search Summary**

| Database | Category | Records Retrieved | Duplicates Removed | Records Screened | Records Assessed for Eligibility | Full-Text Eligible | Notes |
| --- | --- | --- | --- | --- | --- | --- | --- |
| **PubMed / MEDLINE** | *Medical & Health Sciences* | **303** | **0** | **303** | **19** | **10** | MeSH controlled vocabulary + [tiab] field tags; 4-concept Boolean structure. |
| **Science Direct (Journals)** | *Medical & Health Sciences* | **468** | **4** | **464** | **31** | **18** | Research articles only; 5 subject areas; English filter.  Original search string was abbreviated due the database limitations; expanded to full 4-concept structure for elaboration. |
| **Web of Science Core Collection** | *Multidisciplinary Sciences* | **67** | **4** | **63** | **18** | **5** | Topic Search applied to elicit relevant articles based on title, abstract, and author keywords |
| **IEEE Xplore Digital Library** | *Computer Science & Engineering* | **413** | **2** | **411** | **9** | **4** | Journals + Early Access articles.  Unvalidated frameworks excluded at screening. |
| **ACM Digital Library** | *Computer Science & Engineering* | **145** | **0** | **145** | **0** | **0** | No studies met eligibility criteria.  TI,AB field restriction applied. |
| **Computer Science Journals** | *Computer Science & Engineering* | **0** | **0** | **0** | **0** | **0** | Zero results retrieved. Likely extensive overlap with Science Direct and IEEE Xplore within this domain.  No filters applied. |
| **Google Scholar** | *Multidisciplinary* | **615** | **18** | **597** | **43** | **10** | Natural-language query.  First 300 results screened (~pages 1–30); screening discontinued as relevance declined. |
| **CINAHL Full Text (EBSCO)** | *Medical & Nursing Sciences* | **126** | **0** | **126** | **12** | **0** | TI,AB field restriction; English filter; date filter 2021–2026; accessed via EBSCO Host. |
| **Academic Search Ultimate (EBSCO)** | *Multidisciplinary* | **0** | **0** | **0** | **0** | **0** | Zero results retrieved. Coverage in this domain superseded by PubMed, Science Direct, and IEEE Xplore.  No filters applied. |
| **APA PsychInfo (EBSCO)** | *Psychology & Behavioural Sciences* | **165** | **0** | **165** | **1** | **0** | TI,AB field restriction; date filter 2021–2026; EBSCO Host.  Low yield reflects primarily psychological focus of this database. |
| **Elicit AI** | *AI Research Tool (semantic search)* | **100** | **4** | **96** | **8** | **3** | First 100 results screened; screening discontinued as relevance declined.  Semantic relevance ranking; natural-language query.  Date filter: Jan 2021 onwards. |
| **TOTAL** | **11 databases** | **2,402** | **32** | **2370** | **141** | **50** |  |

2. Full Search Strategies by Database

Complete search strategies are presented below for all 11 databases. Filters are listed in the dedicated column.

**Table S1b: Full Search Strategies for Each Database.**

| **Database** | **Full Search Strategy** | **Filters & Search Criteria** | **Retrieved** | **Dups** | **Screened** | Assessed for Eligibility | **Eligible** |
| --- | --- | --- | --- | --- | --- | --- | --- |
| **PubMed / MEDLINE**  *Medical & Health Sciences* | ( "Artificial Intelligence"[Mesh]  OR "Machine Learning"[Mesh]  OR artificial intelligence[tiab]  OR AI[tiab]  OR "machine learning"[tiab]  OR "deep learning"[tiab]  OR "large language model*"[tiab]  OR LLM*[tiab]  OR GPT[tiab]  OR "generative AI"[tiab]  OR "generative artificial intelligence"[tiab]  OR "clinical AI"[tiab]  OR "agentic AI"[tiab]  OR "AI agent"[tiab] )  **AND**  ( "Clinical Decision Support Systems"[Mesh]  OR "clinical decision support"[tiab]  OR "decision support system*"[tiab]  OR "AI-assisted decision"[tiab]  OR "medical decision support"[tiab]  OR "clinical reasoning system"[tiab]  OR CDSS[tiab] )  **AND**  ( "Treatment Outcome"[Mesh]  OR "Patient Safety"[Mesh]  OR outcome*[tiab]  OR "clinical outcome*"[tiab]  OR performance[tiab]  OR accuracy[tiab]  OR safety[tiab]  OR effectiveness[tiab]  OR "comparative effectiveness"[tiab]  OR guidelines[tiab]  OR implementation[tiab]  OR trial[tiab] )  **AND**  ( outpatient[tiab]  OR emergency[tiab]  OR acute[tiab]  OR "general practice"[tiab]  OR "primary care"[tiab]  OR "ambulatory care"[tiab] ) | Date: 2021-01-01 to 2026-12-31  Language: English  Field tags: MeSH + [tiab] | **303** | 0 | **303** | **19** | **10** |
| **Science Direct Journals**  *Medical & Health Sciences* | **Specific Search Term**  ("artificial intelligence" OR "large language model") AND "clinical decision support" AND (outcomes OR accuracy OR safety) AND (outpatient OR “general practice”)  **Expanded Search Term**  ***Concept 1: AI & Large Language Model Technologies***  ( "artificial intelligence"  OR "large language model"  OR "machine learning"  OR "deep learning"  OR "generative AI"  OR "agentic AI"  OR GPT  OR LLM )  **AND**  ***Concept 2: Clinical Decision Support***  ( "clinical decision support"  OR "decision support system"  OR "AI-assisted decision"  OR CDSS  OR diagnosis  OR triage )  **AND**  ***Concept 3: Outcomes & Performance Evaluation***  ( outcomes  OR accuracy  OR safety  OR effectiveness  OR implementation )  **AND**  ***Concept 4: Clinical Settings***  ( outpatient  OR "general practice"  OR emergency  OR "primary care"  OR "ambulatory care" ) | Years: 2021–2026  Article type: Research articles only  Subject areas: Medicine and Dentistry; Computer Science; Nursing and Health Professions; Neuroscience; Decision Sciences  Language: English | **468** | 4 | **464** | **31** | **18** |
| **Web of Science Core Collection**  *Multidisciplinary* | TS=("artificial intelligence"  OR AI  OR "large language model*"  OR LLM*  OR GPT  OR "machine learning"  OR "deep learning"  OR "generative AI"  OR "generative artificial intelligence"  OR "clinical AI"  OR "agentic AI"  OR "AI agent"  )  **AND**  TS=("clinical decision support"  OR "decision support system*"  OR "AI-assisted decision"  OR "medical decision support"  OR "clinical reasoning system"  OR CDSS  OR CDS  OR diagnosis  OR treatment  OR triage  )  **AND**  TS=(outcome*  OR performance  OR accuracy  OR "clinical outcome"  OR safety  OR "patient safety"  OR effectiveness  OR "comparative effectiveness"  OR guidelines  OR evaluation  OR validation  OR implementation  OR trial  OR adoption  )  **AND**  TS=(outpatient  OR emergency  OR acute  OR "general practice"  OR "primary care"  OR "general care"  OR "ambulatory care"  ) | Publication Year: 2021–2026  Language: English  Field: TS  Topic Search applied to elicit relevant articles based on title, abstract, and author keywords | **67** | **4** | **63** | **18** | **5** |
| **IEEE Xplore Digital Library**  *Computer Science & Engineering* | ("artificial intelligence"  OR AI  OR "large language model*"  OR LLM*  OR GPT  OR "machine learning"  OR "deep learning"  OR "generative AI"  OR "generative artificial intelligence"  OR "clinical AI"  OR "agentic AI"  OR "AI agent"  )  **AND**  ***Concept 2: Clinical Decision Support***  ("clinical decision support"  OR "decision support system*"  OR "AI-assisted decision"  OR "medical decision support"  OR "clinical reasoning system"  OR CDSS  OR CDS  OR diagnosis  OR treatment  OR triage  )  **AND**  (outcome*  OR performance  OR accuracy  OR "clinical outcome"  OR safety  OR "patient safety"  OR effectiveness  OR "comparative effectiveness"  OR guidelines  OR evaluation  OR validation  OR implementation  OR trial  OR adoption  )  **AND**  (outpatient  OR emergency  OR acute  OR "general practice"  OR "primary care"  OR "general care"  OR "ambulatory care"  ) | Year: 2021–2026  Document types: Journals + Early Access | **413** | **2** | **411** | **9** | **4** |
| **ACM Digital Library**  *Computer Science & Engineering* | TI,AB ("artificial intelligence"  OR AI  OR "large language model*"  OR LLM*  OR GPT  OR "machine learning"  OR "deep learning"  OR "generative AI"  OR "generative artificial intelligence"  OR "clinical AI"  OR "agentic AI"  OR "AI agent"  )  **AND**  TI,AB ("clinical decision support"  OR "decision support system*"  OR "AI-assisted decision"  OR "medical decision support"  OR "clinical reasoning system"  OR CDSS  OR CDS  OR diagnosis  OR treatment  OR triage  )  **AND**  TI,AB (outcome*  OR performance  OR accuracy  OR "clinical outcome"  OR safety  OR "patient safety"  OR effectiveness  OR "comparative effectiveness"  OR guidelines  OR evaluation  OR validation  OR implementation  OR trial  OR adoption  )  **AND**  TI,AB (outpatient  OR emergency  OR acute  OR "general practice"  OR "primary care"  OR "general care"  OR "ambulatory care"  ) | Date: Jan 2021 – Dec 2026  Document types: Journals and research articles  Field: TI,AB | **145** | **0** | **145** | **0** | **0** |
| **Computer Science Journals**  *Computer Science & Engineering* | Zero results retrieved. Likely substantial overlap with Science Direct and IEEE Xplore within this domain. No unique indexed material found matching all aspects of the search term for this period.  ("artificial intelligence"  OR AI  OR "large language model*"  OR LLM*  OR GPT  OR "machine learning"  OR "deep learning"  OR "generative AI"  OR "generative artificial intelligence"  OR "clinical AI"  OR "agentic AI"  OR "AI agent"  )  **AND**  ("clinical decision support"  OR "decision support system*"  OR "AI-assisted decision"  OR "medical decision support"  OR "clinical reasoning system"  OR CDSS  OR CDS  OR diagnosis  OR treatment  OR triage  )  **AND**  (outcome*  OR performance  OR accuracy  OR "clinical outcome"  OR safety  OR "patient safety"  OR effectiveness  OR "comparative effectiveness"  OR guidelines  OR evaluation  OR validation  OR implementation  OR trial  OR adoption  )  **AND**  (outpatient  OR emergency  OR acute  OR "general practice"  OR "primary care"  OR "general care"  OR "ambulatory care"  ) | No filters applied | **0** | **0** | **0** | **0** | **0** |
| **Google Scholar**  *Multidisciplinary* | ***Natural-language search as appropriate for platform***  Artificial Intelligence - Large Language Models (LLMs)  and Agentic AI in Clinical Decision Support  in General Practice or Outpatient or Acute Settings | Date: 2021–2026  Natural-language query  First 300 results screened (pages 1–30)  *Screening discontinued at page 30 as result relevance declined substantially. Google Scholar does not support structured Boolean field-restricted searching.* | **615** | **18** | **597** | **43** | **10** |
| **CINAHL Full Text (EBSCO)**  *Medical & Nursing Sciences* | TI,AB ("artificial intelligence"  OR AI  OR "large language model*"  OR LLM*  OR GPT  OR "machine learning"  OR "deep learning"  OR "generative AI"  OR "generative artificial intelligence"  OR "clinical AI"  OR "agentic AI"  OR "AI agent"  )  **AND**  TI,AB ("clinical decision support"  OR "decision support system*"  OR "AI-assisted decision"  OR "medical decision support"  OR "clinical reasoning system"  OR CDSS  OR CDS  OR diagnosis  OR treatment  OR triage  )  **AND**  TI,AB (outcome*  OR performance  OR accuracy  OR "clinical outcome"  OR safety  OR "patient safety"  OR effectiveness  OR "comparative effectiveness"  OR guidelines  OR evaluation  OR validation  OR implementation  OR trial  OR adoption  )  **AND**  TI,AB (outpatient  OR emergency  OR acute  OR "general practice"  OR "primary care"  OR "general care"  OR "ambulatory care"  ) | Date: Jan 2021 – Dec 2026  Language: English  Field: TI,AB  Access: EBSCO Host | **126** | 0 | **126** | **12** | 0 |
| **Academic Search Ultimate (EBSCO)**  *Multidisciplinary* | Zero results retrieved. Coverage in this clinical AI engineering domain is largely superseded by PubMed, Science Direct, and IEEE Xplore. No unique indexed material found.  ("artificial intelligence"  OR AI  OR "large language model*"  OR LLM*  OR GPT  OR "machine learning"  OR "deep learning"  OR "generative AI"  OR "generative artificial intelligence"  OR "clinical AI"  OR "agentic AI"  OR "AI agent"  )  **AND**  ("clinical decision support"  OR "decision support system*"  OR "AI-assisted decision"  OR "medical decision support"  OR "clinical reasoning system"  OR CDSS  OR CDS  OR diagnosis  OR treatment  OR triage  )  **AND**  (outcome*  OR performance  OR accuracy  OR "clinical outcome"  OR safety  OR "patient safety"  OR effectiveness  OR "comparative effectiveness"  OR guidelines  OR evaluation  OR validation  OR implementation  OR trial  OR adoption  )  **AND**  (outpatient  OR emergency  OR acute  OR "general practice"  OR "primary care"  OR "general care"  OR "ambulatory care"  ) | No additional filters  Access: EBSCO Host | **0** | **0** | **0** | **0** | **0** |
| **APA PsychInfo (EBSCO)**  *Psychology & Behavioural Sciences* | *Low yield reflects primarily psychological/behavioural focus of APA PsychInfo; clinical AI engineering literature is not the core coverage domain of this database.*  TI,AB ("artificial intelligence"  OR AI  OR "large language model*"  OR LLM*  OR GPT  OR "machine learning"  OR "deep learning"  OR "generative AI"  OR "generative artificial intelligence"  OR "clinical AI"  OR "agentic AI"  OR "AI agent"  )  **AND**  TI,AB ("clinical decision support"  OR "decision support system*"  OR "AI-assisted decision"  OR "medical decision support"  OR "clinical reasoning system"  OR CDSS  OR CDS  OR diagnosis  OR treatment  OR triage  )  **AND**  ***Concept 3: Outcomes & Performance Evaluation***  TI,AB (outcome*  OR performance  OR accuracy  OR "clinical outcome"  OR safety  OR "patient safety"  OR effectiveness  OR "comparative effectiveness"  OR guidelines  OR evaluation  OR validation  OR implementation  OR trial  OR adoption  )  **AND**  ***Concept 4: Clinical Settings***  TI,AB (outpatient  OR emergency  OR acute  OR "general practice"  OR "primary care"  OR "general care"  OR "ambulatory care"  ) | Date: 2021–2026  Field: TI,AB  Access: EBSCO Host | **165** | **0** | **165** | **1** | **0** |
| **Elicit AI**  *AI Research Tool* | ***Natural-language query (AI-powered semantic search interface):***  Artificial Intelligence - Large Language Models (LLMs)  and Agentic AI in Clinical Decision Support  in General Practice or Outpatient or Acute or Emergency Settings | Date: Jan 2021 onwards  Semantic relevance ranking  First 100 results screened; screening discontinued as relevance declined.  . | **100** | **4** | **96** | **8** | **3** |

3. Eligibility Criteria

The following criteria were applied consistently during title/abstract screening (two independent reviewers; κ = 0.78) and full-text eligibility assessment (κ = 0.85). Criteria align with the PICOS framework detailed in main manuscript Section 2.2.

**3.1 Inclusion Criteria**

| **#** | **Criterion** | **Operationalisation** | **Rationale** |
| --- | --- | --- | --- |
| **IC1** | **AI/ML Technology Scope** | Studies evaluating generative AI systems (LLMs including GPT series, Claude, Gemini, Llama, PaLM, Med-PaLM, BioGPT, DeepSeek, Mistral, Qwen), agentic AI systems, retrieval-augmented generation systems, fine-tuned LLMs, and multimodal LLMs deployed for clinical decision support. Machine learning-based CDSS (non-LLM) included where directly compared with LLM-based systems or providing material comparative context. | Covers the expanse of generative AI systems including recent evolutions within agentic AI. 3 included ML-CDSS studies (Chen et al. 2024 (MedGuard/ML); Kim et al. 2022 (CatBoost/XGBoost); Gericke et al. 2025 (XGBoost/LightGBM) providing material comparative context with LLM systems. |
| **IC2** | **Clinical Setting** | General practice, primary care, outpatient, urgent care, emergency department, and acute care clinical settings. Studies using virtual or simulated equivalents of these settings (e.g., OSCE scenarios, synthetic clinical vignettes) are eligible if the simulation represents these settings | Consistent with the review objective to capture the full spectrum of AI-CDSS from community-based to acute clinical deployment. |
| **IC3** | **Outcomes Reported** | Must report original quantitative or qualitative data on at least one of:   1. Diagnostic accuracy 2. Triage accuracy 3. Differential diagnosis quality 4. Comparative efficacy against clinician or alternative system 5. Clinical outcomes (patient safety, diagnostic/treatment errors, clinical endpoints); or 6. Implementation factors (adoption, barriers, trust calibration, automation bias, workflow integration, equity) | Broad outcome scope reflects the multi-objective PICOS framework and the four thematic domains of the review. |
| **IC4** | **Publication Type** | Peer-reviewed original research articles; conference proceedings with original data e.g. ACM CHI, AMIA; validated technical framework papers with empirical evaluation; preprints (arXiv, medRxiv) where the study is methodologically sound and data are original. | Conference proceedings and preprints included given the rapid publication pace of AI research; all must report original data. |
| **IC5** | **Language** | English language only | Practical restriction based on reviewer language capacity. |
| **IC6** | **Date Range** | Published between 1 January 2021 and 31 December 2026. | Start date captures the post-GPT-3 modern generative AI era; end date inclusive of early 2026 publications identified during February 2026 searches. |

**3.2 Exclusion Criteria**

| **#** | **Criterion** | **Operationalisation** | **Rationale** |
| --- | --- | --- | --- |
| **EC1** | **Technology Scope** | Studies of rule-based CDSS without AI/ML component; narrow single-algorithm machine learning tools e.g. threshold-based alert systems not used as AI-CDSS comparators; administrative AI applications; AI for drug discovery. | **R**estrictions of earlier non generative AI aligned CDSS. |
| **EC2** | Clinical Domain Misalignment | Studies addressing clinical aspects unrelated to clinical decision support e.g. AI for diagnostic imaging analysis alone without decision support component; AI for administrative tasks (scheduling, billing, coding) only; pharmacogenomics without CDSS application. | Focus is on AI systems that actively support clinical reasoning and decision-making at the point of care. |
| **EC3** | Clinical Setting | Studies focused exclusively on inpatient, intensive care, surgical theatre, or highly specialised procedural settings e.g. catheterisation laboratory, endoscopy suite, unless the study includes an emergency department or primary/outpatient care component from which separate data can be extracted. | Focus on acute and outpatient applications, with considerations of acute settings with linked admissions |
| **EC4** | Duplicate Records | Where the same study data are reported in multiple publications, the most comprehensive report is included and additional reports excluded. | As per PRISMA provisions |
| **EC5** | Unvalidated Frameworks | Conceptual frameworks, theoretical models, and system architectures that have not been empirically tested or validated with clinical data or clinical scenario data. | Ensures the evidence base reflects empirically tested systems only. |
| **EC6** | Review Articles | Narrative reviews, scoping reviews, opinion articles, editorials, letters, and commentary without original data. Systematic reviews and meta-analyses excluded as primary included studies but may be used as contextual background. Conference poster abstracts without full data also excluded. | Focus on eliciting original data to augment novelty in the topic |
| **EC7** | Language | Studies not published in English. | Pragmatic language restriction based on author(s) limitations |

4. Supplementary Search Activities

**4.1 Hand Searching**

The following supplementary search activities were conducted in addition to the 11 database searches:

1. Reference list hand-searching: Reference lists of all 50 included studies were manually searched to identify eligible studies not captured by database searches.
2. Systematic review forward-searching: Reference lists of 5 key systematic reviews and meta-analyses identified during database screening were searched for primary studies within scope.

**4.3 Screening Process and Inter-Rater Reliability**

Title/abstract screening and full-text eligibility assessment were conducted independently by two reviewers (KK and EM). A calibration exercise on 50 records was completed prior to screening. Disagreements were resolved by discussion; unresolved disagreements were referred to EO for adjudication.

**Inter-rater reliability (Cohen's κ):**

- Title/abstract screening: κ = 0.78 (substantial agreement)
- Full-text eligibility assessment: κ = 0.85 (excellent agreement)

5. PRISMA 2020 Flow Diagram Data

The data below inform Figure 1 (PRISMA 2020 flow diagram) in the main manuscript. Reasons for exclusion at full-text stage are provided. For complete PRISMA 2020 checklist see Supplementary Table S4.

| **Stage** | **Description** | **n** | **Cumulative / Notes** |
| --- | --- | --- | --- |
| **1** | Records identified from all database searches (11 databases combined) | 2,402 | *Total across all databases before deduplication* |
| **2** | Duplicate records removed (manual deduplication) | 32 | *2,402 − 32 = 2,370 unique records* |
| **3** | Unique records screened at title and abstract level (2 independent reviewers; κ = 0.78) | 2,370 | *All unique records screened* |
| **4** | Records excluded at title/abstract screening (did not meet IC1–IC6) | 2,229 | *2,370 − 2,229 = 141 for full-text retrieval* |
| **5** | Reports sought for full-text retrieval | 141 | *All 141 full texts successfully retrieved* |
| **6** | Reports assessed for full-text eligibility (2 independent reviewers; κ = 0.85) | 141 | *All retrieved reports assessed* |
| **7** | Reports excluded at full-text stage (reasons below) | 91 | *141 − 91 = 50 studies included* |
| 7a | Reason: Wrong intervention - non-CDSS AI application (EC1/EC2) | 32 | *Largest exclusion category* |
| 7b | Reason: Wrong setting - exclusively inpatient/surgical (EC3) | 24 |  |
| 7c | Reason: Wrong study design - review/opinion/editorial (EC6) | 5 |  |
| 7d | Reason: Duplicate data - superseded by more comprehensive report (EC4) | 3 |  |
| 7e | Reason: Wrong outcomes - no extractable data on any review outcome (IC3) | 27 |  |
| **8** | **Studies included in the systematic review** | **50** | Final included study set |

*Full-text exclusion reasons: primary exclusion reason recorded for each excluded report. Total excluded at full-text = 91 (141 assessed − 50 included = 91). Sub-reason counts are approximate as some reports met multiple exclusion criteria; primary reason determines classification. IC = Inclusion Criterion; EC = Exclusion Criterion.*

Supplementary Table S2: Characteristics of All 50 included Studies

Full data extraction for all 50 studies meeting inclusion criteria. *Domain: DA = Diagnostic Accuracy; CE = Comparative Efficacy; CO = Clinical Outcomes; IF = Implementation Factors. Quality: High = all MMAT criteria met; Moderate = one or two criteria not met; Low = three or more criteria not met.

CDSS = Clinical Decision Support System; ED = Emergency Department; EHR = Electronic Health Record; ENT = Ear, Nose and Throat; GP = General Practitioner; LLM = Large Language Model; MLLM = Multimodal Large Language Model; ML = Machine Learning; NLP = Natural Language Processing; OSCE = Objective Structured Clinical Examination; RAG = Retrieval-Augmented Generation; RCT = Randomised Controlled Trial.

| **#** | **Author (Year)** | **Country** | **Study Design** | **Clinical Setting** | **Sample Size** | **LLM/AI Model(s)** | **Comparator** | **Primary Outcomes Assessed** | **Key Findings** | **Domain*** |
| --- | --- | --- | --- | --- | --- | --- | --- | --- | --- | --- |
| **1** | Geneş & Deveci (2024) | Turkey | Cross-sectional vignette | Emergency medicine (cardiovascular) | 20 standardised scenarios | ChatGPT-4o | Emergency physicians; Cardiologists | Diagnostic accuracy, completeness, response time | ChatGPT-4o and cardiologists both 100% correct; ChatGPT fastest; significant difference vs emergency physicians (p<0.001); κ=0.92 | DA |
| **2** | Saban & Dubovi (2025) | Israel | Cross-sectional vignette study | Emergency nursing/clinical | n=68 (30 expert nurses, 38 students) | ChatGPT (unspecified version) | Expert ED nurses (n=30); Novice nursing students (n=38) | Clinical decision-making accuracy, re-evaluation, test appropriateness | ChatGPT indecisive; suggested unnecessary tests; failed re-evaluation; 27-41× longer responses; 4× faster than novices | DA, CE |
| **3** | Rao et al. (2025) | USA | Quantitative descriptive | Emergency/general medicine (physical exam) | 19 chief complaints (3 physician raters) | GPT-4 | Two EM attendings, 1 IM attending (raters only) | Accuracy, comprehensiveness, readability, overall quality (Likert 1-5) | Accuracy 4.16/5; comprehensiveness 3.95/5; readability 4.39/5; overall 3.89/5; ≥80% max score; needs more vital sign integration | DA, IF |
| **4** | Ebnali Harari et al. (2025) | USA | Randomised controlled trial | Emergency/telemedicine (cardiac arrest) | n=54 participants (non-medical) | ChatGPT (autonomous); Clinician-supervised ChatGPT | Paper guide; Autonomous ChatGPT | Decision accuracy, cognitive load (LF/HF ratio), trust | Supervised ChatGPT: highest accuracy, lowest cognitive load, highest trust; autonomous ChatGPT suggested risky option in 1 instance | CE, IF |
| **5** | Normand et al. (2025) | UK (NHS) | Retrospective EHR-based study | NHS primary care (medication safety) | n=277 patients (from 2,125,549-adult EHR) | Multiple state-of-the-art LLMs (primary system unspecified) | Expert clinician review | Sensitivity/specificity for issue detection; complete correct intervention rate | 100% sensitivity, 83.1% specificity; complete correct intervention 46.9%; 5 failure patterns: overconfidence, no patient-context adjustment, process blindness, factual errors, delivery misunderstanding | CO, DA |
| **6** | Chen et al. (2024) | Taiwan | Retrospective observational | Outpatient (academic hospital) | 1,206,895 prescriptions; 28,536 alerts over 2 years | MedGuard (ML-CDSS, non-LLM) | Expert pharmacist review | Alert acceptance rate, drug error interception, wrong-drug/LASA errors | 2.36% alert rate; 48.88% acceptance; 28.08% prescription changes; 16.4 drug errors intercepted/1,000 alerts; reduced LASA errors | CO, IF |
| **7** | Rothchild et al. (2025) | USA | Quantitative descriptive (pilot) | Emergency (upper extremity trauma) | 16 resident responses; 10 vignettes; 16 ChatGPT responses | ChatGPT-4.0 | Plastic surgery residents (junior n=9, senior n=7) | Total score, ER management score, diagnosis score, definitive treatment score (0-30) | ChatGPT higher total score (26.6 vs 22.7, p<0.05); higher ER management (9.9 vs 6.7, p<0.05); no significant difference in diagnosis/treatment; underpowered | DA, CE |
| **8** | Schmidgall et al. (2025) | International (multi-site) | Benchmark/simulation (agentic AI) | Simulated clinical (9 specialties, 7 languages) | 9 medical specialties; 7 languages; multiple LLM agents | Claude-3.5, GPT-4o, Llama-3, others | Multiple LLM backbones compared | Diagnostic accuracy, tool use (experiential learning, retrieval, reflection), sequential decision-making; resilience to bias | Sequential tasks dramatically reduce accuracy (to <1/10 of static benchmark); Claude-3.5 agents perform best; Llama-3 with notebook tool: 92% relative improvement.  GPT-4 demonstrated resilience to cognitive and implicit biases, maintaining high  diagnostic accuracy, while other deteriorated | DA, CE,  IF |
| **9** | Susanto et al. (2025) | Indonesia | Randomised controlled trial (3-way within-subject) | Primary care/outpatient (resource-constrained) | n=102 GPs; 9 vignettes per GP (918 total) | AI-based CDS prototype (ML: RF, neural networks, LR) | Automated CDS; No decision support (control) | ASCVD risk assessment accuracy, statin/aspirin/antihypertensive prescribing, referral decisions, decision time | AI-CDS: +27% risk assessment (NNT=3.7); +29% statin prescribing; -9s decision time; no significant improvement in aspirin/antihypertensives/referral; 79% would follow recommendations | CE, CO,  IF |
| **10** | Korom et al. (2025) | Kenya | Quality improvement study (non-randomised implementation) | Primary care (15 clinics, Penda Health network) | 39,849 patient visits | LLM-based AI Consult tool (safety-net CDSS) | Clinicians without AI access (control clinics) | Diagnostic error rate; treatment error rate; clinician-reported quality improvement | 16% fewer diagnostic errors; 13% fewer treatment errors; estimated 22,000 diagnostic + 29,000 treatment errors averted/year; 100% clinicians: AI improved care quality; 75% "substantial" | CO, IF |
| **11** | Mansoor (2025) | USA (preprint – medRxiv) | Quantitative descriptive (synthetic vignettes) | Psychiatric emergency (adolescent suicide risk) | 40 synthetic vignettes (C-SSRS framework; 2 psychiatrist gold standard) | GPT-4o; Claude 3.5 Sonnet; Llama-3.1-70B | Gold standard: 2 board-certified child/adolescent psychiatrists | Risk classification accuracy, precision, recall, F1; qualitative action plan analysis | GPT-4o 82.5%, Claude 3.5 75.0%, Llama 67.5% accuracy; F1 lower for nuanced high-risk categories; pervasive safety failures: no lethal means inquiry, no protective factors, inappropriate reassurance | DA, CO |
| **12** | Pasli et al. (2025) | Turkey | Prospective multicentre observational | 4 EDs (2 tertiary, 2 secondary hospitals) | n=6,657 patients | ChatGPT-4o (hospital-customised with ESI + local protocols) | Triage personnel (nurses/physicians); EM specialist gold standard | Triage accuracy (ESI), Cohen’s κ, F1 score, AUC by zone | ChatGPT-4o κ=0.833 (vs triage personnel 0.782); F1 0.897 vs 0.863; AUC >0.90 overall; lower in tertiary yellow/red zones (AUC 0.75-0.78) | DA, CE |
| **13** | Perlis et al. (2025) | International | Quantitative descriptive (vignettes + expert comparison) | Outpatient psychiatry/primary care (treatment-resistant depression) | 20 vignettes (320 permutations); expert psychopharmacologists; community clinicians | Qwen 2.5:7B (augmented with guideline synopsis) | Expert psychopharmacologists (n=2 primary; additional group n=140 vignettes); community clinicians (n=91 vignettes) | Optimal treatment selection rate; Cohen’s κ; contraindicated treatment rate; demographic bias | LLM: 35.6% optimal first choice (κ=0.34); no contraindicated selections; community clinicians 13.2%; expert group 6.4%; no gender/race bias in permuted vignettes | DA, CE |
| **14** | Pan et al. (2025) | China | Retrospective observational | Outpatient neurosurgery (CNS tumours) | 338 outpatient cases (bilingual Chinese/English) | ChatGPT-4o; DeepSeek-R1; Doubao | Experienced neurosurgeons | Differential diagnosis, main diagnosis, treatment recommendation accuracy (McNemar test) | ChatGPT-4o & DeepSeek-R1: >90% differential/main diagnosis (p>0.05 vs surgeons); treatment accuracy ~80% (p<0.05 vs surgeons); Doubao underperformed; no language-related difference | DA, CE |
| **15** | Ekingen & Ucdal (2026) | Turkey (5 centres) | Cross-sectional multicentre (vignette-based) | Emergency/cardiovascular surgery (aortic dissection) | 25 validated MCQs; 9 physicians (radiologists n=3, EM n=3, CV surgeons n=3) | MLLM (GPT-4V + Med-PaLM 2 + BioGPT); Unimodal LLM (ChatGPT-5.2) | Radiologists, EM specialists, cardiovascular surgeons | Overall accuracy by domain (diagnosis, treatment, complications); chi-square comparisons | MLLM 92.0%, ChatGPT-5.2 96.0%; CV surgeons 96.0%, radiologists 92.0%, EM 89.3%; no significant differences between AI and human groups (all p>0.05) | DA, CE |
| **16** | Feldman et al. (2025) | USA (3 academic centres) | Diagnostic study (comparative) | General medicine (inpatient, outpatient case reports) | 36 unpublished real-world cases (mean age 51.4y) | GPT-4 (LLM1); Gemini 1.5 (LLM2) | DXplain (DDSS); 3 blinded physician raters | Presence of case diagnosis in top-25 differential, with and without lab data; quintile ranking | Without labs: DXplain 56%, LLM1 42%, LLM2 39% (p>0.05); With labs: DXplain 72%, LLM1 64%, LLM2 58%; lab data markedly improves all systems | DA |
| **17** | Kim et al. (2022) | Vietnam | Quantitative descriptive (pilot) | Primary care/outpatient (infectious diseases) | 1,129 patients; 7 disease categories | CatBoost, XGBoost, LightGBM (ML-CDSS) | 4-fold cross-validation; held-out test set | Diagnostic accuracy, F1-score by disease category | CatBoost best: 87.61% accuracy, F1 87.71; range F1 0.80-0.97; lowest for sepsis; highest for CNS infection; feasible in resource-limited settings | DA, CO |
| **18** | Hack et al. (2026) | Israel | Quantitative descriptive (FAQ evaluation) | Primary care/general practice (ENT) | 12 clinical vignettes | ChatGPT 4, ChatGPT 5, Gemini 2.0, OpenEvidence AI | 5 independent otolaryngologists (raters) | Diagnostic and management Accuracy, Referral appropriateness. | LLMs showed comparable diagnostic and management accuracy to clinicians, as well as higher referral appropriateness | DA, IF |
| **19** | Hirosawa et al. (2024) | Japan | Quantitative descriptive (case reports) | General medicine/primary care | 1,176 differential lists (392 case descriptions) | GPT-4 (as evaluator); GPT-4, Gemini (Bard), LLaMA2 (as generators) | 2 independent physicians (evaluators) | Concordance between GPT-4 evaluation and physician evaluation of differential lists; Cohen’s κ | 82.1% concordance between GPT-4 and physicians; κ=0.63 (fair-to-good); GPT-4 failed to identify final dx in 16% of cases where physicians succeeded | DA |
| **20** | Ali & Cui (2025) | China | Quantitative descriptive (image-based) | Primary care (dermatology) | Dermatology images (n not stated in excerpt) | ChatGPT (image evaluation) | Dermatologist consensus | Image-based diagnostic accuracy for skin conditions | Moderate diagnostic accuracy for dermatological image diagnosis via ChatGPT; details limited in RIS entry | DA |
| **21** | Croxford et al. (2025) | USA | Retrospective EHR-based evaluation | Primary care/general medicine (EHR summaries) | Real EHR multi-document summaries (n not stated) | GPT-o3-mini; multiple reasoning and non-reasoning LLMs | PDSQI (validated human instrument) as gold standard; human reviewers | Intraclass correlation coefficient with human raters; evaluation time; score difference | GPT-o3-mini: ICC=0.818 (95% CI 0.772-0.854); median score difference=0 from humans; 22 seconds/evaluation; reasoning models outperform non-reasoning for complex evaluations | CO, DA |
| **22** | Zhan et al. (2025) | China | Quantitative comparative study | Outpatient/general medicine (infectious diseases) | 75 questions (T/F, open-ended, case-based); 3 residents; 3 specialists | GPT-4o | Resident physicians (n=3); Senior infectious disease specialists (n=3) | Accuracy and completeness by question type (Likert scales; chi-square/Fisher/Kruskal-Wallis) | T/F: GPT-4o 87.5% ≈ specialists 90.3%; open-ended & case-based: specialists outperform GPT-4o (p=0.008, p=0.02); GPT-4o more complete than residents (p<0.001 for open-ended) | DA, CE |
| **23** | Vrdoljak et al. (2025) | Croatia | Prospective comparative study | Emergency internal medicine ward (University Hospital Split) | 73 anonymised patient cases (June-Sept 2024) | o1 LRM; Claude-3.5-Sonnet; Llama-3.2-70B | 2 blinded internal medicine specialists + human-authored reports | Likert-scale ratings (1-4 or 1-3): diagnostic tests, final diagnosis, therapy plan, follow-up; lab value classification | o1 mean 3.63 (p=0.62 vs humans 3.67); Claude-3.5 3.38, Llama 3.23 (p<0.01 vs o1); all ≥90% diagnostic + admission accuracy; o1 100% lab classification | DA, CE |
| **24** | Gaber et al. (2025) | Germany/International | Quantitative benchmark | Simulated (MIMIC-derived: triage, referral, diagnosis) | 2,000 MIMIC-derived cases; multiple LLM workflows | Multiple LLMs + RAG workflow vs base LLMs | Benchmark comparisons across workflows | Triage urgency, specialist referral, diagnosis suggestion accuracy | RAG-augmented LLM workflow improved triage, referral, and diagnosis across all metrics; LLMs provide personalised insights into likely diagnoses and specialist suggestions | DA, CE |
| **25** | Zayed et al. (2025) | Belgium | Quantitative descriptive | Primary care + emergency care (lab test ordering) | 15 simulated cases (5 primary care, 5 ED, 5 complex) | GPT-4o | Expert consensus gold standard | Self-consistency, precision (PPV), recall (sensitivity), false negatives/positives (zero-shot vs chain-of-thought) | High self-consistency; precision 68-82%; recall 41-51%; variability in conditional tests; chain-of-thought vs zero-shot: no significant difference | DA |
| **26** | Popescu et al. (2021) | Canada | Longitudinal feasibility study (quasi-experimental) | Outpatient psychiatry (major depressive disorder) | 17 patients; 7 physicians; min 3 visits per patient | AI-powered CDSS (neural network + CANMAT guidelines) | Each patient as own control (baseline vs CDSS visits) | Appointment length, ease of use (Likert), trust, patient-clinician relationship quality | No significant change in appointment length (F2,24=0.805, p=0.46); 71% physicians easy to use + trustworthy; 92% patients easy to use; 46% patients: improved relationship | IF, CO |
| **27** | Williams et al. (2024) | US | Retrospective observational (highly powered) | Emergency department (real clinical notes) | 10,000 ED visits (randomised selection) | GPT-3.5-turbo; GPT-4-turbo (4 prompting strategies each) | Resident physician (gold standard) | Accuracy for 3 clinical recommendations: admission status, radiology request, antibiotic prescribing | GPT-4: 8% lower; GPT-3.5: 24% lower than resident; both overly cautious (high sensitivity, low specificity); no LLM-prompting strategy outperformed resident | DA, CE |
| **28** | Hager et al. (2024) | Germany/International | Retrospective benchmark (MIMIC dataset) | Emergency/acute care (real clinical data) | MIMIC dataset (2400 patient cases) | Multiple frontier LLMs (GPT-4, Claude, Llama, Gemini, Mistral) | Physician-defined clinical guideline adherence; mitigation interventions | Guideline adherence, safe lab interpretation, information order sensitivity, mitigation effect | LLMs fail to follow diagnostic guidelines; cannot safely interpret labs; highly sensitive to clinical information order; mitigation strategies partially improve performance | DA, CO,  IF |
| **29** | Szumilas et al. (2024) | Poland | Prospective cohort study | Primary care (laboratory test interpretation) | 101 patients; | LabTest Checker (AI-driven CDSS) | Gold standard: clinical expert review; comparison with no-AI baseline | 100% sensitivity for emergency safety; unnecessary visit reduction; underlying pathology identification accuracy | 100% sensitivity for emergency safety alerts; 41.6% reduction in unnecessary medical visits; 82.9% pathology identification accuracy | CO, DA |
| **30** | Shikino et al. (2024) | Japan | Quantitative descriptive (retrospective cases) | General medicine (atypical presentations) | Cases from Japanese hospital database (25 clinical vignettes) | ChatGPT (GPT-4) | Physician assessment of concordance (gold standard) | Diagnostic concordance for top-ranked diagnosis by atypicality grade | Adequate for mildly atypical; concordance = 0% for highly atypical presentations; critical vulnerability for atypical disease | DA |
| **31** | Niset et al. (2025) | Belgium | Prospective real-world ED evaluation | Emergency department (real-world, 24-hour peak) | 79 consecutive real-world ED cases; 2,370 AI predictions (6 pipeline × 5 top-diagnoses per patient) | Multiple open-source (grounded) + closed-source LLMs (6 pipelines) | Cross-comparison of open vs closed-source; expert diagnosis as gold standard | Top-5 diagnostic prediction accuracy; citation quality | Open-source grounded LLMs = closed-source (62-72% top-5 accuracy); grounded models provide verifiable source citations; RAG critical for transparency | DA, CE |
| **32** | Rajashekar et al. (2024) | USA | Randomised controlled trial (simulated HCI) | Simulated clinical (upper GI bleeding scenario) | N=31 | LLM-augmented AI-CDSS (LLM interface layer on existing CDSS) | Traditional CDSS without LLM interface | Ease-of-use, trust, human-computer interaction quality | LLM-augmented CDSS: improved ease-of-use and trust; clinicians viewed AI as collaborative team member vs rigid algorithm; HCI design critical for adoption | IF, CE |
| **33** | Zöller et al. (2025) | International (multi-site) | Vignette-based comparative (large-scale) | Simulated clinical (multiple specialties) | 40,762 differential diagnoses; 2,133 vignettes; 1,552 physicians + multiple LLMs | Multiple LLMs (GPT series, others); individual physicians; physician groups | Single physicians; Single LLMs; Physician-only collectives; Human-AI collectives | Differential diagnosis accuracy across specialties; collective vs individual performance | Human-AI collectives > all others; complementary error patterns drive advantage; benefit robust across specialties and LLM models; LLM failures on social/contextual reasoning | CE |
| **34** | Kücking et al. (2026) | Germany | Simulated diagnostic intervention study | Simulated clinical (diagnostic scenarios) | 223 physicians and nurses; 1,338 diagnostic decisions | AI-CDSS with simulated correct/incorrect recommendations | Unaided physicians; AI providing correct vs incorrect recommendations | Diagnostic accuracy by AI correctness; automation bias rate | Correct AI: 10× more likely to make correct decision; incorrect AI: degraded accuracy below unaided performance; automation bias profound and bidirectional | CE, IF |
| **35** | Giebel et al. (2025) | Germany | Qualitative (expert interviews) | Healthcare system-wide | Multiple expert stakeholders n=17 (physicians, IT, administrators, ethicists) | AI-CDSS broadly (not model-specific) | N/A (qualitative) | Barriers and improvement pathways for AI-CDSS (thematic analysis) | Seven improvement areas identified: data quality, interoperability, transparency, validation, training, regulation, workflow integration | IF |
| **36** | Ong et al. (2025) | Singapore | Prospective cross-over study (open-label) | Multiple specialties (16 medical/surgical) | 91 error scenarios; 40 clinical vignettes | 5 RAG-enhanced LLMs (model details not specified) | Pharmacist-alone (baseline); prescribing error ground truth | Prescribing error detection accuracy; co-pilot vs solo comparison | LLM co-pilot: 61% accuracy; 1.5× improvement over pharmacist alone; greatest benefit for serious harm errors; RAG essential for performance | CE, CO, IF |
| **37** | Arslan et al. (2025) | Turkey | Cross-sectional vignette study | Emergency department | 468 clinical vignettes | ChatGPT (GPT-4); Microsoft Copilot | Emergency physician assessors | Primary/differential diagnosis accuracy (top-1, top-3); concordance with expert | ChatGPT 91.9%, Copilot 90.2% correct in top-3 differentials; moderate agreement with expert clinicians  AI wanes for definitive diagnosis, in comparison to EM physicians. Critical missed diagnosis. | DA, CE |
| **38** | Esmaeilzadeh et al. (2021) | USA | Experimental study (survey-based) | Healthcare broadly (patient-facing AI) | 102 participants (patients) | AI clinical applications (conceptual) | Human physician care (preference comparison) | Patient acceptance, privacy concerns, trust, value compatibility | Significant privacy/liability concerns; incompatibility with instrumental/technical/ethical/regulatory values = primary rejection reason; prefer AI as augmentative vs substitutive | IF |
| **39** | Wen et al. (2026) | China | Quantitative descriptive (comparative benchmark) | Primary care/outpatient (atrial fibrillation anticoagulation) | 9 LLMs; anticoagulation decision scenarios (NVAF) | 9 LLMs including GPT-4o, Claude, Llama, Gemini, DeepSeek, Qwen | Expert cardiology consensus gold standard; cross-LLM comparison | Anticoagulation decision accuracy, guideline concordance across 9 LLMs | Performance varies substantially by model; newer models (GPT-4o, Claude) outperform older; LLMs approaching but not matching specialist-level anticoagulation decisions | DA, CE |
| **40** | Lee et al. (2025) | South Korea | Retrospective observational | Emergency department (non-critical triage) | Real-world ED clinical conversations (1057 triage cases) | ChatGPT; Gemini 2.5 Flash; DeepSeek | Gold standard: ED physician triage decision | Triage accuracy (PPV, accuracy) using raw unsummarised dialogue | Gemini 2.5 Flash: 73.8% accuracy, PPV 94.0%; feasible use of raw conversational data for triage; LLMs viable for non-critical triage support | DA |
| **41** | Tung et al. (2025) | Singapore | Comparative study | Outpatient/primary care (prostate cancer screening) | PSA testing cases; 5 junior clinicians (closed-book/open-book) | RAG-enhanced LLM (model details not stated) | Junior clinicians (closed-book 62.3%, open-book 74.1%) | Guideline-concordant PSA testing recommendation rate | RAG-LLM 95.5% guideline concordance; significantly outperformed junior clinicians in both formats (p<0.05) | DA, CE |
| **42** | Gericke et al. (2025) | Belgium | Retrospective observational (ML-based) | Psychiatric emergency department (suicide/STB risk) | ED psychiatric presentations (n=96,681 in study population, specific sample for STB prediction) | XGBoost, LightGBM (ML/CDSS) | Conventional clinical assessment (baseline risk stratification) | AUC for STB prediction (1, 6, 12-month); calibration; clinical utility for targeting interventions | AUC up to 0.80; good calibration; potential for identifying high-risk individuals; interpretable; personalised risk stratification | DA, CO |
| **43** | Goh et al. (2025) | USA | Randomised controlled trial | Emergency (chest pain triage, video vignettes) | n=50 US-licensed physicians; White male + Black female patient vignettes | GPT-4 (AI assistance) | Unaided physicians (pre-intervention) | Diagnostic accuracy change; demographic bias (White male vs Black female patient group) | AI assistance: +18% accuracy; no introduction/amplification of demographic bias; comparable benefit for both patient groups | CE, CO |
| **44** | Soliman et al. (2025) | Egypt | Cross-sectional vignette/image study | Primary care (dermatology) | Skin condition images.  136 patients | Google Lens (consumer AI app) | Dermatologist consensus (gold standard) | Top-1 and top-3 diagnostic accuracy for skin conditions | Top-1 accuracy: 53.7%; top-3 accuracy: 71.3%; promising adjunctive screening tool; not for standalone diagnosis | DA |
| **45** | Karamanlıoğlu et al. (2025) | Turkey | System design + real-world evaluation (mixed methods) | Emergency triage (privacy-preserving architecture) | Real ED patient data (n=132 patient encounters) | LLMs integrated in federated learning + differential privacy architecture | Baseline triage system (non-federated) | Triage accuracy, latency, GDPR/HIPAA compliance, privacy preservation | Novel privacy-preserving architecture; processes structured vitals/labs + unstructured notes; GDPR/HIPAA compliant; maintains triage accuracy with low latency | IF, DA |
| **46** | Giebel et al. (2025) | Germany | Qualitative (expert interviews) | Healthcare system-wide | Multiple stakeholders – 15 experts; 309 expert statements | AI-CDSS broadly | N/A (qualitative) | Barriers to AI-CDSS adoption (thematic analysis; 7 categories) | 7 barrier categories: technology, data, users, studies, ethics, law, general integration; users 33%; data 19.1%; technology 14.9%; 309 expert statements | IF |
| **47** | Yu et al. (2025) | China | Cross-sectional (fuzzy set QCA survey) | Primary + secondary + tertiary hospitals (China) | Doctors across hospital tiers (n=450doctors) | AI-CDSS (broadly) | N/A (implementation study) | AI-CDSS adoption pathways; enabler conditions (fsQCA) | 6 pathways (tertiary), 3 pathways (primary/secondary); performance expectancy + personal innovativeness = indispensable core conditions across all pathways | IF |
| **48** | Vedadi et al. (2025) | International (Google) | Simulated OSCE (agentic AI) | Primary care (simulated OSCE, physician oversight framework) | Simulated OSCE cases  n=60 scenarios | Guardrailed-AMIE (g-AMIE) – agentic conversational AI | Standalone nurse practitioners (NPs); physician assistants (PAs); physician oversight model | Information-gathering quality; composite clinical decision quality; physician oversight model feasibility | g-AMIE outperformed standalone NPs/PAs in information gathering; physician oversight model feasible; asynchronous review enables scalable primary care AI integration | DA, CE, IF |
| **49** | Hassan et al. (2025) | Norway/Egypt | Qualitative (semi-structured interviews + observations) | High-stakes clinical care (intensive/acute settings) | Clinicians from Norway (n = 28) and Egypt | AI prediction systems (black-box) + XAI versions | N/A (qualitative); within-subject XAI vs no-XAI | Trust, clinical interrogation behaviours, readiness to update judgement, human-AI collaboration quality | XAI significantly increased trust; reduced AI interrogation effort; promoted openness to reconsider AI-contradicting judgements; key mechanism: transparency enables appropriate trust calibration | IF |
| **50** | Elkin et al. (2021) | USA | Evaluation and case-control study | Primary care/general medicine (EHR: NVAF detection) | EHR database (6M+ patients; specific sample for NLP evaluation) | NLP + structured EHR data combined (AI system) | Structured-data-only baseline; clinician coding | NVAF case discovery rate; stroke prevention modelling (via improved anticoagulation) | 32.1% improvement in NVAF case discovery; modelled prevention of 176,537 strokes/year in USA via improved anticoagulation; combining NLP + structured data synergistically improves discovery | CO, DA |

Supplementary Table S3: MMAT Version 2018 Quality Assessment Results

Quality assessment of all 50 included studies using the Mixed Methods Appraisal Tool (MMAT) version 2018, as applicable for various study designs. Overall quality: High = all criteria met (Yes); Moderate = one or two criteria not met (No or Can't tell); Low = three or more criteria not met. Shading: Green = Yes; Red = No; Yellow = Can't tell

| **Legend:** | **Yes** | **No** | Can’t tell | N/A | **High Quality** | **Moderate Quality** | **Low Quality** |  |  |
| --- | --- | --- | --- | --- | --- | --- | --- | --- | --- |

| **#** | **First Author (Year)** | **Study Type** | **Q1** | **Q2** | **Q3** | **Q4** | **Q5** | **Overall Quality** |
| --- | --- | --- | --- | --- | --- | --- | --- | --- |
| **RCT Criteria:** | **Randomised Controlled Trial Studies (n=4)** | | **Q1: Randomisation adequate** | **Q2: Groups comparable at baseline** | **Q3: Blinding of participants/personnel** | **Q4: Outcome data completeness** | **Q5: Adherence to assigned intervention** |  |
| **4** | Ebnali Harari et al. (2025) | Randomised Controlled Trial | **Yes** | **Yes** | **Yes** | **Yes** | **Yes** | **High** |
| **9** | Susanto et al. (2025) | Randomised Controlled Trial | **Yes** | **Yes** | **Yes** | **Yes** | **No** | **Moderate** |
| **32** | Rajashekar et al. (2024) | Randomised Controlled Trial | **Yes** | **Yes** | **Yes** | **Yes** | **Yes** | **High** |
| **43** | Goh et al. (2025) | Randomised Controlled Trial | **Yes** | **Yes** | **Yes** | **Yes** | **Yes** | **High** |
| **QNR Criteria:** | **Quantitative Non-Randomised Studies (n=8)** | | **Q1: Selection represents target population** | **Q2: Measurements appropriate + identical** | **Q3: Confounders accounted for** | **Q4: Exposure measured before outcome** | **Q5: Outcome data complete** |  |
| **5** | Normand et al. (2025) | Quantitative Non-randomised | **Yes** | **Yes** | **Yes** | **Yes** | **Yes** | **High** |
| **6** | Chen et al. (2024) | Quantitative Non-randomised | **Yes** | **Yes** | **Yes** | **Yes** | **Yes** | **High** |
| **10** | Korom et al. (2025) | Quantitative Non-randomised | **Yes** | **Yes** | **Yes** | **Yes** | Yes | **High** |
| **21** | Croxford et al. (2025) | Quantitative Non-randomised | **Yes** | **Yes** | **Yes** | **Yes** | **Yes** | **High** |
| **26** | Popescu et al. (2021) | Quantitative Non-randomised | **Yes** | **Yes** | No | **Yes** | **Yes** | **Moderate** |
| **27** | Williams et al. (2024) | Quantitative Non-randomised | **Yes** | **Yes** | **Yes** | **Yes** | **Yes** | **High** |
| **28** | Hager et al. (2024) | Quantitative Non-randomised | **Yes** | **Yes** | **Yes** | **Yes** | **Yes** | **High** |
| **36** | Ong et al. (2025) | Quantitative Non-randomised | **Yes** | **Yes** | **Yes** | **Yes** | **Yes** | **High** |
| **40** | Lee et al. (2025) | Quantitative Non-randomised | **Yes** | **Yes** | **Yes** | **Yes** | **Yes** | **High** |
| **42** | Gericke et al. (2025) | Quantitative Non-randomised | **Yes** | **Yes** | **Yes** | **Yes** | **Yes** | **High** |
| **50** | Elkin et al. (2021) | Quantitative Non-randomised | **Yes** | **Yes** | **Yes** | **Yes** | **Yes** | **High** |
| **QD Criteria:** | **Quantitative Descriptive Studies (n=23)** | | **Q1: Sampling represents target population** | **Q2: Sample size adequate/justified** | **Q3: Measurements valid and reliable** | **Q4: Risk of non-response bias low** | **Q5: Statistical analyses appropriate** |  |
| **1** | Geneş & Deveci (2025) | Quantitative Descriptive | **Yes** | **Yes** | **Yes** | **Yes** | **Yes** | **High** |
| **2** | Saban & Dubovi (2025) | Quantitative Descriptive | **Yes** | **Yes** | **Yes** | Can’t tell | **Yes** | **Moderate** |
| **3** | Rao et al. (2025) | Quantitative Descriptive | **Yes** | **Yes** | Can’t tell | Can’t tell | **Yes** | **Moderate** |
| **7** | Rothchild et al. (2025) | Quantitative Descriptive | **Yes** | **Yes** | **Yes** | Can’t tell | **Yes** | **Moderate** |
| **8** | Schmidgall et al. (2025) | Quantitative Descriptive | **Yes** | **Yes** | **Yes** | **Yes** | **Yes** | **High** |
| **11** | Mansoor (2025) | Quantitative Descriptive | **Yes** | **Yes** | **Yes** | **No** | **Yes** | **Moderate** |
| **12** | Pasli et al. (2025) | Quantitative Descriptive | **Yes** | **Yes** | **Yes** | **Yes** | **Yes** | **High** |
| **13** | Perlis et al. (2025) | Quantitative Descriptive | **Yes** | **Yes** | **Yes** | **Yes** | **Yes** | **High** |
| **14** | Pan et al. (2025) | Quantitative Descriptive | **Yes** | **Yes** | **Yes** | **Yes** | **Yes** | **High** |
| **15** | Ekingen & Ucdal (2026) | Quantitative Descriptive | **Yes** | **Yes** | **Yes** | **No** | **Yes** | **Moderate** |
| **16** | Feldman et al. (2025) | Quantitative Descriptive | **Yes** | **Yes** | **Yes** | **Yes** | **Yes** | **High** |
| **17** | Kim et al. (2022) | Quantitative Descriptive | **Yes** | **Yes** | **Yes** | **Yes** | **Yes** | **High** |
| **18** | Hack et al. (2026) | Quantitative Descriptive | **Yes** | **Yes** | **Yes** | No | **Yes** | **Moderate** |
| **19** | Hirosawa et al. (2024) | Quantitative Descriptive | **Yes** | **Yes** | **Yes** | **Yes** | **Yes** | **High** |
| **20** | Ali & Cui (2025) | Quantitative Descriptive | **Yes** | **No** | **Can’t tell** | **Yes** | **No** | **Low** |
| **22** | Zhan et al. (2025) | Quantitative Descriptive | **Yes** | **Yes** | **Yes** | **Yes** | **Yes** | **High** |
| **23** | Vrdoljak et al. (2025) | Quantitative Descriptive | **Yes** | **Yes** | **Yes** | **Yes** | **Yes** | **High** |
| **24** | Gaber et al. (2025) | Quantitative Descriptive | **Yes** | **Yes** | **Yes** | **Yes** | **Yes** | **High** |
| **25** | Zayed et al. (2025) | Quantitative Descriptive | **Yes** | **Yes** | **Yes** | **Yes** | **Yes** | **High** |
| **29** | Szumilas et al. (2024) | Quantitative Descriptive | **Yes** | **Yes** | **Yes** | **Yes** | **Yes** | **High** |
| **30** | Shikino et al. (2024) | Quantitative Descriptive | **Yes** | **Yes** | **Yes** | **No** | **Yes** | **Moderate** |
| **31** | Niset et al. (2025) | Quantitative Descriptive | **Yes** | **Yes** | **Yes** | **Yes** | **Yes** | **High** |
| **33** | Zöller et al. (2025) | Quantitative Descriptive | **Yes** | **Yes** | **Yes** | **Yes** | **Yes** | **High** |
| **34** | Kücking et al. (2026) | Quantitative Descriptive | **Yes** | **Yes** | **Yes** | **Yes** | **Yes** | **High** |
| **37** | Arslan et al. (2025) | Quantitative Descriptive | **Yes** | **Yes** | **Yes** | **Yes** | **Yes** | **High** |
| **38** | Esmaeilzadeh et al. (2021) | Quantitative Descriptive | **Yes** | **Yes** | **Yes** | **Yes** | **Yes** | **High** |
| **39** | Wen et al. (2026) | Quantitative Descriptive | **Yes** | **Yes** | **Yes** | **Yes** | **Yes** | **High** |
| **41** | Tung et al. (2025) | Quantitative Descriptive | **Yes** | **No** | **Yes** | **Yes** | **Yes** | **Moderate** |
| **44** | Soliman et al. (2025) | Quantitative Descriptive | **Yes** | **Yes** | **Yes** | **No** | **Yes** | **Moderate** |
| **47** | Yu et al. (2025) | Quantitative Descriptive | **Yes** | **Yes** | **Yes** | **Yes** | **Yes** | **High** |
| **48** | Vedadi et al. (2025) | Quantitative Descriptive | **Yes** | **Yes** | **Yes** | **Yes** | **Yes** | **High** |
| **QUAL Criteria:** | **Qualitative Studies (n=4)** | | **Q1: Qualitative approach appropriate** | **Q2: Data collection addresses research question** | **Q3: Findings adequately derived from data** | **Q4: Interpretation substantiated by data** | **Q5: Coherence: data–interpretation–conclusions** |  |
| **35** | Giebel et al. (2025a) (2025) | Qualitative | **Yes** | **Yes** | **Yes** | **Yes** | **Yes** | **High** |
| **46** | Giebel et al. (2025b) (2025) | Qualitative | **Yes** | **Yes** | **Yes** | **Yes** | **Yes** | **High** |
| **49** | Hassan et al. (2025) | Qualitative | **Yes** | **Yes** | **Yes** | **Yes** | **Yes** | **High** |
| **MM Criteria:** | **Mixed Methods Studies (n=1)** | | **Q1: MM rationale clear** | **Q2: MM design addresses research question** | **Q3: Methods adequately integrated** | **Q4: Divergences between methods addressed** | **Q5: Integration informs conclusions** |  |
| **45** | Karamanlıoğlu et al. (2025) | Mixed Methods | **Yes** | **Yes** | **Yes** | **Yes** | **Yes** | **High** |

Supplementary Table S4: PRISMA 2020 Checklist

This checklist follows the PRISMA 2020 statement. *✓ = Fully reported; P = Partially reported; ✗ = Not applicable or not reported.*

| **Section/Topic** | **Item #** | **Checklist Item** | **Reported** | **Location in Document** |
| --- | --- | --- | --- | --- |
| **TITLE** | | | | |
| Title | **1** | Identify the report as a systematic review. | **✓** | Title page |
| **ABSTRACT** | | | | |
| Abstract | **2** | See the PRISMA 2020 for Abstracts checklist. | **✓** | Abstract (pp.1–2) |
| **INTRODUCTION** | | | | |
| Rationale | **3** | Describe the rationale for the review in the context of existing knowledge. | **✓** | Section 1.2 |
| Objectives | **4** | Provide an explicit statement of the objective(s) or question(s) the review addresses. | **✓** | Section 1.3 |
| **METHODS** | | | | |
| Eligibility criteria | **5** | Specify the inclusion and exclusion criteria for the review and how studies were grouped for the syntheses. | **✓** | Section 2.2 |
| Information sources | **6** | Specify all databases, registers, websites, organisations, reference lists and other sources searched or consulted to identify studies. Specify the date when each source was last searched or consulted. | **✓** | Section 2.3 |
| Search strategy | **7** | Present the full search strategies for all databases, registers and websites, including any filters and limits used. | **P** | Section 2.3 (example); Supp. Table S1 |
| Selection process | **8** | Specify the methods used to decide whether a study met the inclusion criteria of the review, including how many reviewers screened each record and each report retrieved, whether they worked independently, and if applicable, details of automation tools used in the process. | **✓** | Section 2.4 |
| Data collection process | **9** | Specify the methods used to collect data from reports, including how many reviewers collected data from each report, whether they worked independently, any processes for obtaining or confirming data from study investigators, and if applicable, details of automation tools used in the process. | **✓** | Section 2.5 |
| Data items | **10a** | List and define all outcomes for which data were sought. Specify whether all results that were compatible with each outcome domain in each study were sought (e.g. for all measures, time points, groups), and if not, the methods used to decide which results to collect. | **✓** | Section 2.6 |
|  | **10b** | List and define all other variables for which data were sought (e.g. participant and intervention characteristics, funding sources). Describe any assumptions made about any missing or unclear information. | **✓** | Section 2.6 |
| Study risk of bias assessment | **11** | Specify the methods used to assess risk of bias in the included studies, including details of the tool(s) used, how many reviewers assessed each study and whether they worked independently, and if applicable, details of automation tools used in the process. | **✓** | Section 2.7 |
| Effect measures | **12** | Specify for each outcome the effect measure(s) (e.g. risk ratio, mean difference) used in the synthesis or presentation of results. | **P** | Narrative synthesis; effect measures as reported by primary studies |
| Synthesis methods | **13a** | Describe the processes used to decide which studies were eligible for each synthesis (e.g. tabulating the study intervention characteristics and comparing against the planned groups for each synthesis). | **✓** | Section 2.8 |
|  | **13b** | Describe any methods required to prepare the data for presentation or synthesis, such as handling of missing summary statistics, or data conversions. | **✓** | Section 2.8 |
|  | **13c** | Describe any methods used to tabulate or visually display results of individual studies and syntheses. | **✓** | Section 2.8; Supplementary Tables S5–S6 |
|  | **13d** | Describe any methods used to synthesise results and provide a rationale for the choice(s). If meta-analysis was performed, describe the model(s), method(s) to identify the presence and extent of statistical heterogeneity, and software package(s) used. | **✓** | Section 2.8 (SWiM guideline; narrative synthesis) |
|  | **13e** | Describe any methods used to explore possible causes of heterogeneity among study results (e.g. subgroup analysis, meta-regression). | **✓** | Section 2.8 |
|  | **13f** | Describe any sensitivity analyses conducted to assess robustness of the synthesised results. | **✓** | Section 2.8; Section 3.3 |
| Reporting bias assessment | **14** | Describe any methods used to assess risk of bias due to missing results in a synthesis (arising from reporting biases). | **P** | Section 4.6 (discussed as limitation) |
| Certainty assessment | **15** | Describe any methods used to assess certainty (or confidence) in the body of evidence for an outcome. | **P** | Section 2.7; MMAT quality assessment used; GRADE not applied |
| **RESULTS** | | | | |
| Study selection | **16a** | Describe the results of the search and selection process, including reasons for exclusion (ideally using a flow diagram). | **✓** | Section 3.1; Figure 1 (PRISMA flow) |
|  | **16b** | Cite any studies that might appear to meet the inclusion criteria, but which were excluded, and explain why they were excluded. | **✓** | Section 3.1 (exclusion reasons reported) |
| Study characteristics | **17** | Cite each included study and present its characteristics. | **✓** | Section 3.2; Table 1; Supplementary Table S2 |
| Risk of bias in studies | **18** | Present assessments of risk of bias for each included study. | **✓** | Section 3.3; Supplementary Table S3 |
| Results of individual studies | **19** | For all outcomes, present, for each study: (a) summary statistics for each group (if applicable) and (b) an effect estimate and its precision (e.g. confidence/credible interval), ideally using structured tables or plots. | **P** | Results sections 3.4-3.7; Supplementary Tables S5-S6; individual statistics reported narratively |
| Results of syntheses | **20a** | For each synthesis, briefly summarise the characteristics and risk of bias among contributing studies. | **✓** | Sections 3.4–3.8; quality contextualized |
|  | **20b** | Present results of all statistical syntheses conducted. If meta-analysis was done, present for each the summary estimate and its precision and measures of statistical heterogeneity. If comparing groups, describe the direction of the effect. | **P** | Narrative synthesis; no meta-analysis (heterogeneity precluded) |
|  | **20c** | Present results of all investigations of possible causes of heterogeneity among study results. | **✓** | Sections 3.4-3.8 |
|  | **20d** | Present results of all sensitivity analyses conducted to assess the robustness of the synthesised results. | **✓** | Section 3.3 |
| Reporting biases | **21** | Present assessments of risk of bias due to missing results (arising from reporting biases) for each synthesis assessed. | **P** | Section 4.6 |
| Certainty of evidence | **22** | Present assessments of certainty (or confidence) in the body of evidence for each outcome assessed. | **P** | Section 4.6; MMAT-based quality contextualization |
| **DISCUSSION** | | | | |
| Discussion | **23a** | Provide a general interpretation of the results in the context of other evidence. | **✓** | Section 4.2 |
|  | **23b** | Discuss any limitations of the evidence included in the review. | **✓** | Section 4.5 |
|  | **23c** | Discuss any limitations of the review processes used. | **✓** | Section 4.6 |
|  | **23d** | Discuss implications of the results for practice, policy, and future research. | **✓** | Sections 4.3-4.4; 5 (Conclusions) |
| **OTHER INFORMATION** | | | | |
| Registration and protocol | **24a** | Provide registration information for the review, including register name and registration number, or state that the review was not registered. | **P** | Section 2.1 (PROSPERO) |
|  | **24b** | Indicate where the review protocol can be accessed, or state that a protocol was not prepared. | **P** | PROSPERO |
|  | **24c** | Describe and explain any amendments to information provided at registration or in the protocol. | **✗** | No amendments to protocol |
| Support | **25** | Describe sources of financial or other support for the review, and the role of the funders or sponsors in the review. | **✓** | Acknowledgements |
| Competing interests | **26** | Declare any competing interests of review authors. | **✓** | Conflicts of Interest statement |
| Availability of data, code and other materials | **27** | Report which of the following are publicly available and where they can be found: template data collection forms; data extracted from included studies; data used for all analyses; analytic code; any other materials used in the review. | **✓** | Data Availability statement |

*Reference: Page MJ, et al. The PRISMA 2020 statement: an updated guideline for reporting systematic reviews. BMJ. 2021;372:n71.* *https://www.bmj.com/content/372/bmj.n71*

Supplementary Table S5: Synthesis of Diagnostic Accuracy Findings Across Studies

Summary of quantitative diagnostic accuracy data extracted from included studies

| **Study (Year)** | **Clinical Domain** | **LLM/AI Model** | **Accuracy Metric** | **Result** | **Comparator** | **Comparator Result** | **Key Note** |
| --- | --- | --- | --- | --- | --- | --- | --- |
| Vrdoljak et al. (2025) | Emergency internal medicine | **o1 LRM** | Mean Likert rating (1–4 scale) | **3.63** | Human physicians | 3.67 (p=0.62) | All LLMs ≥90% dx accuracy; o1 matched expert performance |
| Vrdoljak et al. (2025) | Emergency internal medicine | **Claude-3.5-Sonnet** | Mean Likert rating (1–4 scale) | **3.38** | Human physicians | 3.67 (p<0.01) | Significant gap in therapy planning |
| Vrdoljak et al. (2025) | Emergency internal medicine | **Llama-3.2-70B** | Mean Likert rating (1–4 scale) | **3.23** | Human physicians | 3.67 (p<0.01) | Lowest of the three LLMs |
| Pasli et al. (2025) | Emergency triage (4 EDs, 6,657 patients) | **ChatGPT-4o** | Cohen's κ (ESI triage vs gold standard) | **0.833 (near-perfect)** | Triage personnel | 0.782 | F1=0.897 (AI) vs 0.863 (nurses); AUC>0.90 overall; lower in tertiary red/yellow zones |
| Williams et al. (2024) | Emergency dept (10,000 real visits) | **GPT-4-turbo** | Accuracy vs resident (clinical recommendations) | **8% below resident** | Resident physician | Gold standard | Overly cautious: high sensitivity, low specificity |
| Williams et al. (2024) | Emergency dept (10,000 real visits) | **GPT-3.5-turbo** | Accuracy vs resident (clinical recommendations) | **24% below resident** | Resident physician | Gold standard | Consistent across 4 prompting strategies |
| Geneş & Deveci (2024) | Cardiovascular emergencies (20 scenarios) | **ChatGPT-4o** | Correct response rate; inter-rater κ | **100%; κ=0.92** | Emergency physicians | Lower accuracy (p<0.001) | Cardiologists also 100%; AI fastest responder |
| Ekingen & Ucdal (2026) | Aortic dissection (25 MCQs, 5 centres) | **Multimodal LLM (GPT-4V+Med-PaLM2+BioGPT)** | Overall accuracy (diagnosis/treatment/complications) | **92.0%** | CV surgeons | 96.0% (p>0.05) | No significant differences AI vs any human group |
| Ekingen & Ucdal (2026) | Aortic dissection (25 MCQs, 5 centres) | **ChatGPT-5.2 (unimodal)** | Overall accuracy | **96.0%** | CV surgeons | 96.0% (p>0.05) | Top performer; equivalent to specialist surgeons |
| Arslan et al. (2025) | Emergency department (468 vignettes) | **ChatGPT (GPT-4)** | Correct dx in top-3 differentials | **91.9%** | Emergency physicians | — | Moderate agreement with expert clinicians |
| Arslan et al. (2025) | Emergency department (468 vignettes) | **Microsoft Copilot** | Correct dx in top-3 differentials | **90.2%** | Emergency physicians | — | Comparable to ChatGPT |
| Pan et al. (2025) | CNS tumours outpatient (338 cases) | **ChatGPT-4o** | Differential + main diagnosis accuracy | **≥90% (p>0.05 vs neurosurgeons)** | Experienced neurosurgeons | — | Treatment recommendation: 80.5% (p<0.05 lower than surgeons) |
| Pan et al. (2025) | CNS tumours outpatient (338 cases) | **DeepSeek-R1** | Differential + main diagnosis accuracy | **≥90% (p>0.05 vs neurosurgeons)** | Experienced neurosurgeons | — | Treatment recommendation: 79.0% (p<0.05 lower) |
| Feldman et al. (2025) | General medicine (36 real cases) | **GPT-4 (LLM1)** | Correct dx in top-25 differential (no labs) | **42%** | DXplain (DDSS) | 56% | With labs: LLM1 64%, DDSS 72%; hybrid approach recommended |
| Feldman et al. (2025) | General medicine (36 real cases) | **Gemini 1.5 (LLM2)** | Correct dx in top-25 differential (no labs) | **39%** | DXplain (DDSS) | 56% | With labs: LLM2 58% |
| Zhan et al. (2025) | Infectious diseases (75 questions) | **GPT-4o** | True/false accuracy | **87.5%** | Specialists | 90.3% (p=NS) | Open-ended/case-based: specialists outperform (p<0.05) |
| Hirosawa et al. (2024) | General medicine (1,176 diff dx lists) | **GPT-4** | Concordance with physician evaluation (κ) | **82.1% concordance; κ=0.63** | 2 independent physicians | Gold standard | Failed to identify final dx in 16% where physicians succeeded |
| Lee et al. (2025) | ED non-critical triage (real conversations) | **Gemini 2.5 Flash** | Triage accuracy; PPV | **73.8% accuracy; PPV 94.0%** | ED physician gold standard | — | Feasible using raw unsummarised clinical conversations |
| Niset et al. (2025) | Real-world ED (79 cases, Belgium) | **Open-source grounded LLMs** | Top-5 diagnostic accuracy | **62–72%** | Closed-source LLMs | 62–72% (equivalent) | Grounded open-source = closed-source; verifiable citations |
| Tung et al. (2025) | PSA testing (outpatient) | **RAG-enhanced LLM** | Guideline-concordant recommendation rate | **95.5%** | Junior clinicians (closed-book) | 62.3% (p<0.05) | Open-book clinicians: 74.1% (still significantly lower) |
| Zayed et al. (2025) | Lab test ordering (primary + ED, 15 cases) | **GPT-4o** | Precision (PPV); Recall (sensitivity) | **68–82% precision; 41–51% recall** | Expert consensus gold standard | — | High self-consistency; conditional tests most variable |
| Rothchild et al. (2025) | Upper extremity trauma (10 vignettes) | **ChatGPT-4.0** | Total score (0–30); ER management score | **26.6/30; 9.9/10** | Plastic surgery residents | 22.7; 6.7 (p<0.05) | Underpowered for definitive treatment differences |
| Saban & Dubovi (2025) | ED nursing (3 clinical scenarios) | **ChatGPT (unspecified)** | Clinical decision-making accuracy, re-evaluation | **Below expert nurses** | Expert nurses (n=30) | Superior performance | Indecisive; unnecessary test suggestions; failed re-evaluation |
| Shikino et al. (2024) | General medicine (atypical presentations) | **ChatGPT (GPT-4)** | Top-1 diagnosis concordance by atypicality grade | **0% for highly atypical** | Physician gold standard | — | Critical vulnerability for atypical disease presentations |
| Mansoor (2025) | Psychiatric ED – adolescent suicide risk (40 vignettes) | **GPT-4o** | Risk classification accuracy | **82.5%** | Expert psychiatrist gold standard (C-SSRS) | — | Pervasive safety planning failures despite good classification |
| Mansoor (2025) | Psychiatric ED – adolescent suicide risk (40 vignettes) | **Claude 3.5 Sonnet** | Risk classification accuracy | **75.0%** | Expert psychiatrist gold standard | — | Shared safety planning failures across all tested models |
| Mansoor (2025) | Psychiatric ED – adolescent suicide risk (40 vignettes) | **Llama-3.1-70B** | Risk classification accuracy | **67.5%** | Expert psychiatrist gold standard | — | Lowest performing of the three models |
| Gericke et al. (2025) | Psychiatric ED (STB prediction, ML-CDSS) | **XGBoost** | AUC for STB prediction (1/6/12 months) | **Up to 0.80** | Conventional clinical assessment | — | Good calibration; personalised risk stratification feasible |
| Soliman et al. (2025) | Primary care dermatology | **Google Lens (consumer AI)** | Top-1 accuracy; Top-3 accuracy | **53.7%; 71.3%** | Dermatologist consensus | — | Promising screening adjunct; not for standalone diagnosis |
| Hack et al. (2026) | Primary care / ENT (24 FAQs) | **ChatGPT paid; Gemini** | Accuracy; reliability | **95.8% accuracy; 91.7–100% reliability** | 5 ENT surgeons | Expert consensus | Paid GPT and Gemini best; Gemini extensiveness lowest (62.5%) |
| Schmidgall et al. (2025) | Simulated clinical (9 specialties, agentic) | **Claude-3.5 (agent)** | Sequential diagnostic accuracy (vs static benchmark) | **Best overall; accuracy drops to <1/10 of static** | Other LLM agents | Variable | Llama-3 +92% with notebook tool; sequential tasks far harder |
| Hager et al. (2024) | MIMIC dataset (real EHR) | **Multiple frontier LLMs** | Guideline adherence, safe lab interpretation | **Failed on multiple dimensions** | Physician guidelines | — | Highly sensitive to clinical information presentation order |
| Perlis et al. (2025) | Psychiatry – treatment-resistant depression (320 vignettes) | **Qwen 2.5:7B (augmented)** | Optimal treatment selection rate; κ | **35.6%; κ=0.34** | Community clinicians | 13.2% (κ=0.10) | Expert group: 6.4% (κ=0.03); no contraindicated choices; no demographic bias |

*Results presented as reported by primary study authors. Accuracy definitions vary across studies (e.g. top-1 vs top-3 concordance, Cohen's κ, Likert rating). Studies without extractable quantitative accuracy metrics (implementation-focused, purely qualitative) are not listed in this table.* *Where multiple models were compared, results are presented per model. Accuracy metrics as reported by study authors. CoK = Cohen's kappa; PPV = Positive Predictive Value; NR = Not Reported; AUC = Area Under Curve; C-SSRS = Columbia-Suicide Severity Rating Scale; CNS = Central Nervous System; dx = diagnosis; ESI = Emergency Severity Index; DDSS = Dedicated Diagnostic Support System; ENT = Ear Nose Throat; FAQs = Frequently Asked Questions; GP = General Practitioner; LLM = Large Language Model; MCQ = Multiple-Choice Questions; MLLM = Multimodal LLM; PPV = Positive Predictive Value; PSA = Prostate-Specific Antigen; RAG = Retrieval-Augmented Generation; RCT = Randomised Controlled Trial; STB = Suicidal Thoughts and Behaviours.*

Supplementary Table S6: Synthesis of Implementation Barriers and Facilitators

Summary of implementation-relevant findings from included studies. Studies not reporting implementation data are excluded. Categories derived inductively from included study findings and aligned with the seven-category framework from Giebel et al. (2025).

| **Study (Year)** | **Setting** | **Study Type** | **Barriers Identified** | **Facilitators Identified** | **Trust / Automation Bias Findings** | **Workflow Integration Findings** | **Key Implementation Recommendations** |
| --- | --- | --- | --- | --- | --- | --- | --- |
| Giebel et al. (2025b) [46] | Healthcare system-wide (Germany) | Qualitative | 7 barrier categories: technology (14.9%), data (19.1%), users (33%), studies, ethics, law, integration; 309 expert statements; user barriers dominant | Expert stakeholder input as co-design; phased validation approach; clear evidence base | Not directly measured; cited as user-category barrier (resistance, trust deficit) | EHR integration absent as critical barrier; interoperability issues prominent | Involve all stakeholders in design; address user resistance proactively; establish evidence base before deployment |
| Giebel et al. (2025a) [35] | Healthcare system-wide (Germany) | Qualitative | Data quality/interoperability; transparency; lack of clinical validation; liability uncertainty | Transparency and explainability; evidence-based validation; clinician training; regulatory clarity | AI opacity cited as fundamental trust barrier | Workflow disruption as top implementation concern | Seven improvement areas: data, transparency, validation, training, regulation, workflow, incentives |
| Hassan et al. (2025) [49] | High-stakes clinical (Norway/Egypt) | Qualitative (interviews + observations) | AI opacity/black-box; trust calibration failures; clinician interrogation burden without XAI | XAI mechanisms: significantly increased trust; promoted openness to update clinical judgement; reduced interrogation burden | Pre-XAI: distrust, heavy interrogation; post-XAI: appropriate trust calibration, readiness to reconsider AI-contradicting judgements | XAI facilitates rather than disrupts clinical workflow | Deploy XAI as minimum requirement; frame as learning tool not replacement |
| Yu et al. (2025) [47] | Tertiary + primary/secondary hospitals (China) | Cross-sectional (fsQCA) | Distrust; lack of personal innovativeness; low performance expectancy (especially primary/secondary level doctors) | Performance expectancy; personal innovativeness = indispensable core conditions across all hospital tiers and adoption pathways | Performance expectancy directly moderates trust and adoption intention | 6 pathways (tertiary) vs 3 pathways (primary/secondary); different adoption dynamics by hospital tier | Tailor adoption strategies by hospital tier; demonstrate clinical value; cultivate innovation culture |
| Rajashekar et al. (2024) [32] | Simulated clinical (upper GI bleeding RCT) | RCT (HCI) | Traditional CDSS viewed as rigid algorithm (barrier to collaborative use) | LLM interface layer: improved ease-of-use, trust, perceived collaboration; clinician viewed AI as team member | LLM framing shifted CDSS from ‘tool’ to ‘colleague’ thereby improved trust and engagement | LLM interface does not add cognitive burden when well-designed | Design conversational AI interfaces; frame as collaborative rather than prescriptive |
| Esmaeilzadeh et al. (2021) [38] | Patient-facing healthcare (USA) | Experimental (patient survey) | Privacy concerns; liability uncertainty; regulatory opacity; instrumental/technical/ethical/regulatory incompatibility | Augmentative (not substitutive) AI framing; transparency about AI role and limitations | Patients: acceptance highly conditional on transparency and human physician remaining in control | Patients prefer AI as supplement, not replacement, for physician | Communicate AI role clearly; preserve physician authority; address privacy through transparent data governance |
| Popescu et al. (2021) [26] | Outpatient psychiatry (Canada) | Longitudinal feasibility study | Small clinician sample; adaptation required for COVID-19 remote delivery | No increase in appointment length; 71% physicians found tool easy + trustworthy; 92% patients rated easy to use | 62% patients + 71% physicians trusted CDSS; trust supported by demonstrated feasibility | No workflow disruption demonstrated in clinical feasibility study | Conduct feasibility studies before large deployment; easy-to-use design critical for clinician uptake |
| Korom et al. (2025) [10] | Primary care (Kenya, 15 clinics) | Quality improvement | Active deployment + clinician encouragement required (passive deployment insufficient); implementation fidelity critical | Workflow-aligned design (activates only when needed); preserves clinician autonomy; asynchronous safety-net model | 100% clinicians reported improved care; 75% ‘substantial’ improvement - very high trust post-deployment | Activate-only-when-needed design critical for workflow integration | Clinical workflow alignment is prerequisite for uptake; passive tools underperform active deployment support |
| Ebnali Harari et al. (2025) [4] | Emergency telemedicine (RCT) | RCT | Autonomous AI decision-making: risky suggestion in 1 instance; scenario completion time longer with supervised AI | Clinician supervision: highest accuracy + highest trust + lowest cognitive load | Trust highest in supervised condition; trust mediated by perceived accuracy of AI recommendations | Supervised condition longer but safer; tradeoff between time and safety must be managed | Clinician supervision is non-negotiable; train clinicians to supervise AI, not just use it |
| Kücking et al. (2026) [34] | Simulated clinical (Germany) | Simulation study | Incorrect AI recommendations: degraded accuracy below unaided performance; automation bias (15–35% of encounters) | Correct AI recommendations: 10× more likely correct outcome; explicit training in critical evaluation | Automation bias documented (15–35%); highly sensitive to AI confidence presentation style | AI confidence presentation style and context of use modulate automation bias risk | Uncertainty quantification required in AI output; mandatory reasoning documentation when accepting AI |
| Karamanlıoğlu et al. (2025) [45] | Emergency triage (Turkey) | Mixed methods (system design + evaluation) | Privacy/GDPR barriers to sharing real EHR data for model training; traditional architectures cannot process mixed data types | Federated learning + differential privacy: enables collaborative training without raw data sharing; GDPR/HIPAA compliant; processes structured + unstructured data | Not directly assessed in this study | Modular architecture enables low-latency real-time triage support without workflow disruption | Federated learning architectures recommended for privacy-compliant CDSS deployment at scale |
| Normand et al. (2025) [5] | NHS primary care (UK, 277 patients) | Retrospective EHR-based | Contextual reasoning failure; process blindness; overconfidence under uncertainty; guideline application without patient-context adjustment; factual errors (5 failure patterns) | 100% sensitivity for issue detection (clinical safety); demonstrated real-world applicability | Overconfidence in uncertain clinical situations identified as key safety concern | System must understand healthcare delivery processes to be clinically actionable | Failure analysis before deployment; contextual reasoning testing on local healthcare processes required |
| Ong et al. (2025) [36] | Multi-specialty (Singapore, 16 specialties) | Prospective cross-over | Rule-based alert systems generate alert fatigue; standalone LLM insufficient | RAG-enhanced LLM co-pilot: 1.5× pharmacist accuracy improvement; particularly effective for serious harm errors | Co-pilot model generates appropriate calibration (human remains accountable) | 16 specialties tested: demonstrates multi-specialty workflow viability | RAG essential; co-pilot (not autonomous) model is the viable implementation paradigm |
| Goh et al. (2025) [43] | Emergency (chest pain, RCT, USA) | RCT | AI must not amplify existing demographic biases (concern pre-study) | GPT-4 assistance: +18% accuracy without amplifying bias; equal benefit across White male and Black female patient groups | Physicians appropriately updated decisions with AI assistance; no evidence of demographic bias amplification | RCT design: AI assistance provided at point of clinical decision-making without workflow disruption | Monitor equity metrics prospectively; current evidence suggests GPT-4 does not amplify chest pain bias |
| Rajashekar et al. (2024) [32] | Simulated gastrointestinal bleeding | RCT | Traditional CDSS perceived as inflexible and algorithmic by clinicians | LLM-augmented CDSS: improved usability scores, trust, perceived collaboration; shifted view to "team member" | HCI design critically mediates trust formation; conversational framing improves trust | LLM interface layer improves workflow perception without adding significant burden | Investment in HCI design is necessary for CDSS uptake; not just a technical challenge |

*Implementation findings extracted from all studies reporting implementation-related data. Studies reporting only diagnostic accuracy or clinical outcomes without implementation discussion are not included. Reference numbers in square brackets correspond to study listing as per study characteristics table S2.*

*Categories Examples: Technology = system performance, hallucinations, EHR integration; Data = quality, governance, privacy; Users = trust, training, automation bias; Ethics/Law = regulatory, liability; Workflow = integration, usability.*

*CDSS = Clinical Decision Support System; EHR = Electronic Health Record; fsQCA = Fuzzy Set Qualitative Comparative Analysis; GI = Gastrointestinal; GDPR = General Data Protection Regulation; HCI = Human-Computer Interaction; HIPAA = Health Insurance Portability and Accountability Act; LLM = Large Language Model; RAG = Retrieval-Augmented Generation; RCT = Randomised Controlled Trial; XAI = Explainable AI.*
